# Supplementary material
Source: PubMed Central journal article supplement (PMC2797261)
Supplement: supp_M109.018465_jbc.M109.018465-1.pdf [file supp_M109.018465_jbc.M109.018465-1.pdf]

Supplementary FIGURE 1. **The protein composition of the small and large complex are similar.** The Sam68 associated protein from lysates made from either untreated or EGF treated HeLa were pulled down using anti-Sam68 antibody. Proteins were detected by Coomassie blue staining.

Supplementary FIGURE 2. **Level of phosphorylated Sam68 in the different cell lines studied.** Sam68 was immunoprecipitated in growing cells and the level of phosphorylation of tyrosine 440 was detected using the anti-phosphotyrosine 440 specific antibody. Total amount of immunoprecipitated Sam68 was assessed using anti-Sam68 specific antibody.

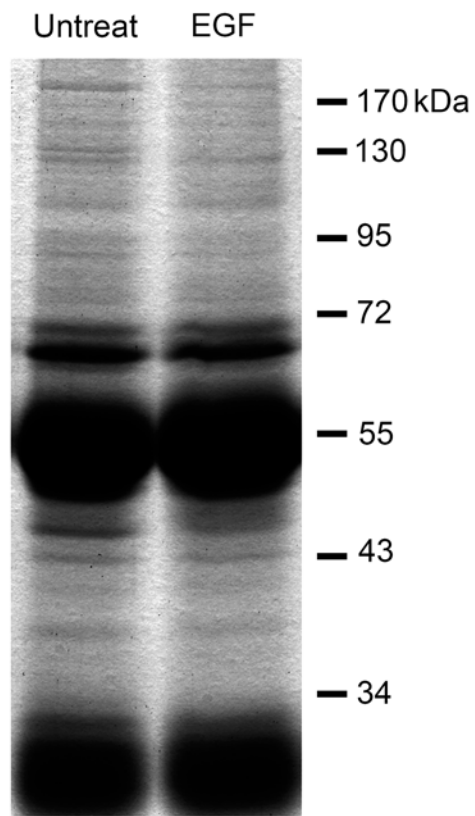

Supplementary Figure 1

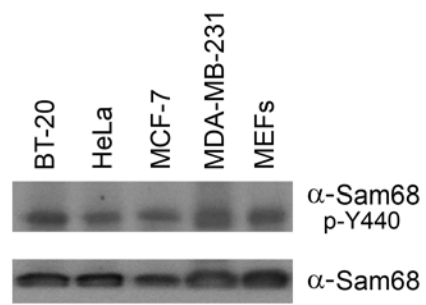

Supplementary Figure 2
